# Supplementary material
Source: publisher figshare collection journal article supplement (https://acs.figshare.com/ndownloader/files/25684721)
Supplement: Supplementary file 1 [file 25684721]

## Supporting Information

### Circumventing Myeloid-Derived Suppressor Cell-Mediated Immunosuppression Using an Oxygen-Generated and -Economized Nanoplatfom

*Huaqin Zuo,<sup>†,‡</sup> Yuchen Hou,<sup>⊥</sup> Yijun Yu,<sup>†</sup> Zhongqiu Li,<sup>⊥</sup> Hanxiao Liu,<sup>†</sup> Chao Liu,<sup>\*,§</sup> Jian He,<sup>\*,□</sup> Leiying Miao,<sup>\*,†</sup>*

<sup>†</sup>Department of Cariology and Endodontics, Nanjing Stomatological Hospital, Medical School of Nanjing University, Nanjing, Jiangsu, 210093, P. R. China.

<sup>‡</sup>Department of Hematology, Northern Jiangsu People's Hospital Affiliated to Yangzhou University, Yangzhou, Jiangsu, 225001, P. R. China.

<sup>§</sup>Department of Orthodontics, Nanjing Stomatological Hospital, Medical School of Nanjing University, Nanjing, Jiangsu, 210093, P. R. China.

<sup>□</sup>Department of Radiology, Nanjing Drum Tower Hospital, The Affiliated Hospital of Nanjing University Medical School, Nanjing University, Nanjing, Jiangsu, 210008, P. R. China.

<sup>⊥</sup>Department of Liver Surgery, RenJi Hospital, School of Medicine, Shanghai Jiao Tong University, Shanghai, 200127, P. R. China.

<sup>⊥</sup>Department of Organ Transplantation, The First Affiliated Hospital of Sun Yat-Sen University, Guangzhou, 510080, P. R. China.

\*Corresponding Authors

Chao Liu: [dxliuchao@163.com](mailto:dxliuchao@163.com)

Jian He: [hjxueren@126.com](mailto:hjxueren@126.com)

Leiying Miao: [miaoleiying80@163.com](mailto:miaoleiying80@163.com)

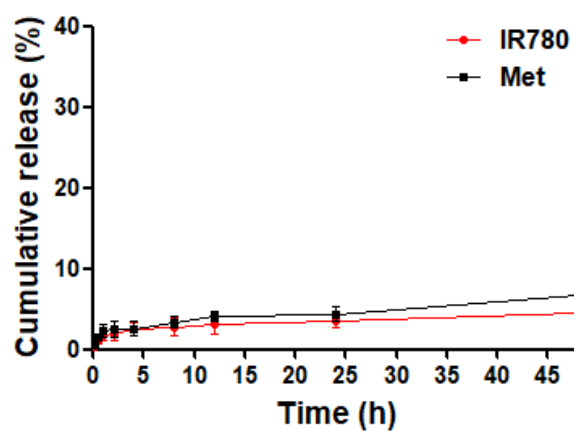

**Figure S1.** *In vitro* release profile of IR780 and Met from CeO<sub>2</sub>@MSNs@IR780/Met nanoparticles in plasma.

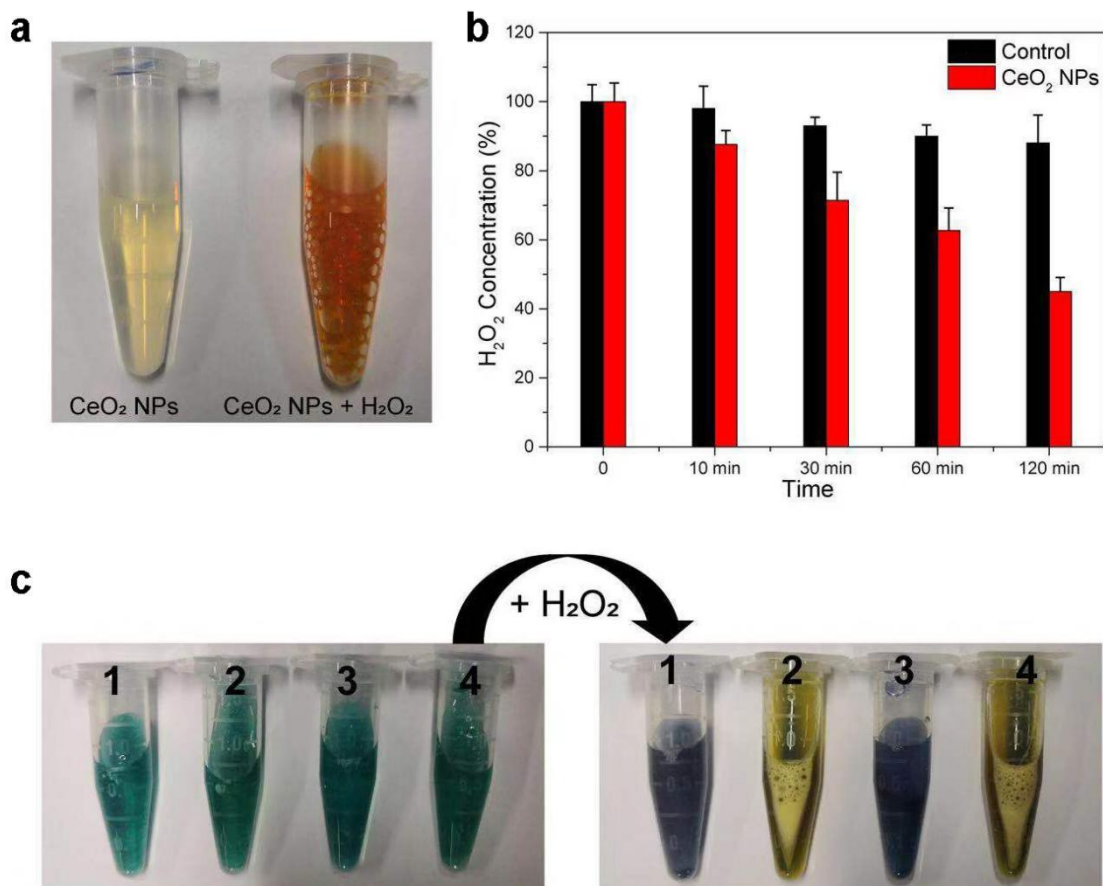

**Figure S2.** Degradation of H<sub>2</sub>O<sub>2</sub> by CeO<sub>2</sub> NPs and the release of O<sub>2</sub>. (a) Photographs of CeO<sub>2</sub> NPs before (right) and after (left) reaction with H<sub>2</sub>O<sub>2</sub>. (b) time-dependent degradation of 10 mM H<sub>2</sub>O<sub>2</sub> after reacting with CeO<sub>2</sub> NPs (1 mg/mL) in PBS. (c) Photographs of different nanocompositions of MSNs before (right) and after (left) reaction with H<sub>2</sub>O<sub>2</sub>, from NO.1 to 4 are MSNs@IR780, CeO<sub>2</sub>@MSNs@IR780, MSNs@IR780/Met and CeO<sub>2</sub>@MSNs@IR780/Met.

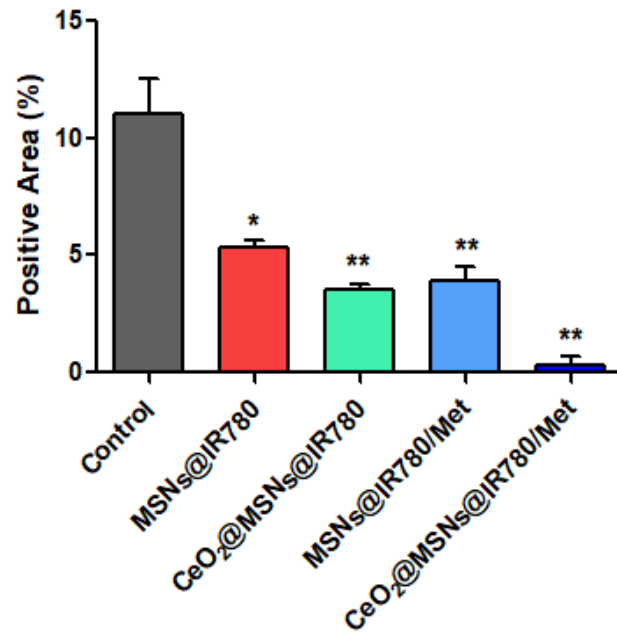

**Figure S3.** Positive area of Ki-67 in tumor tissues after indicated treatments. \*  $p < 0.05$ , \*\*  $p < 0.01$

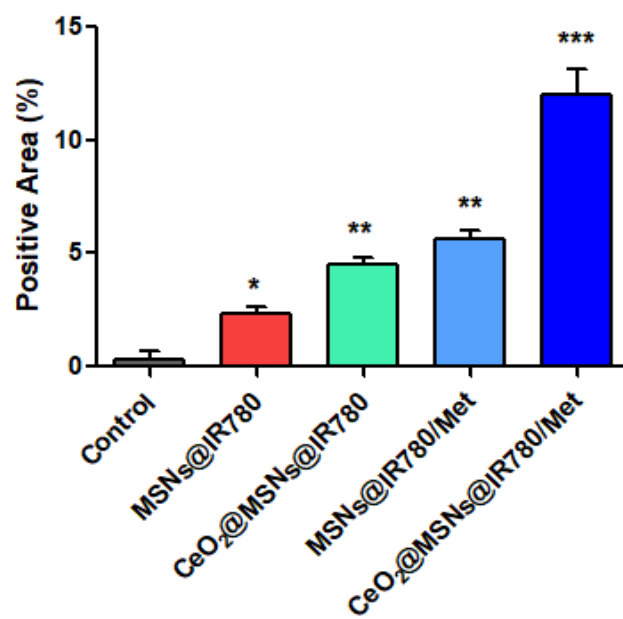

**Figure S4.** Positive area of TUNEL in tumor tissues after indicated treatments. \*  $p < 0.05$ , \*\*  $p < 0.01$ , \*\*\*  $p < 0.001$

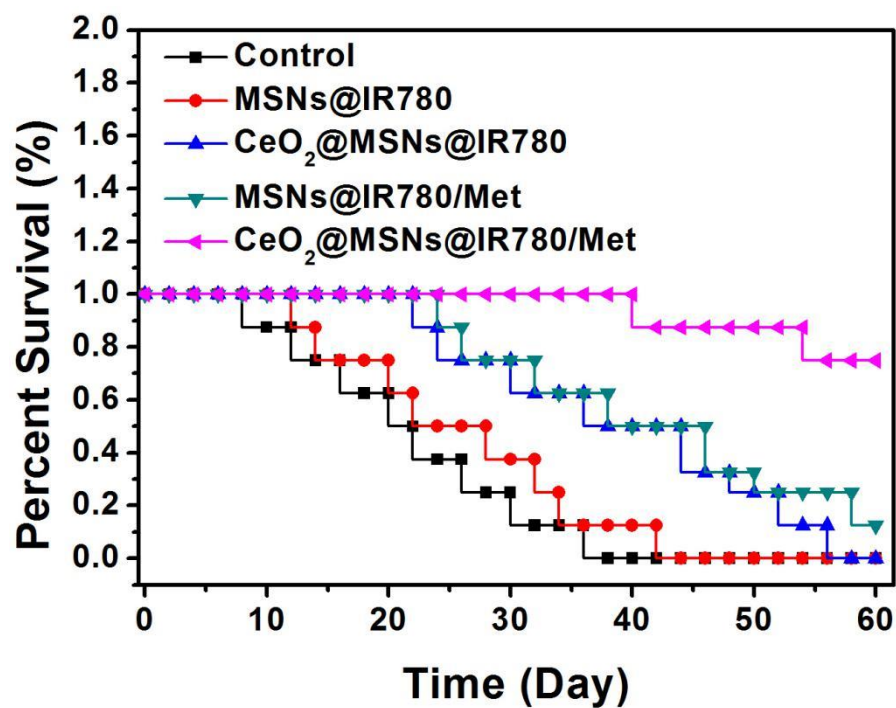

**Figure S5.** Survival curves of B16F10 tumor-bearing mice that received indicated treatments as displayed. Data were analyzed with Kaplan-Meier method (n = 8).

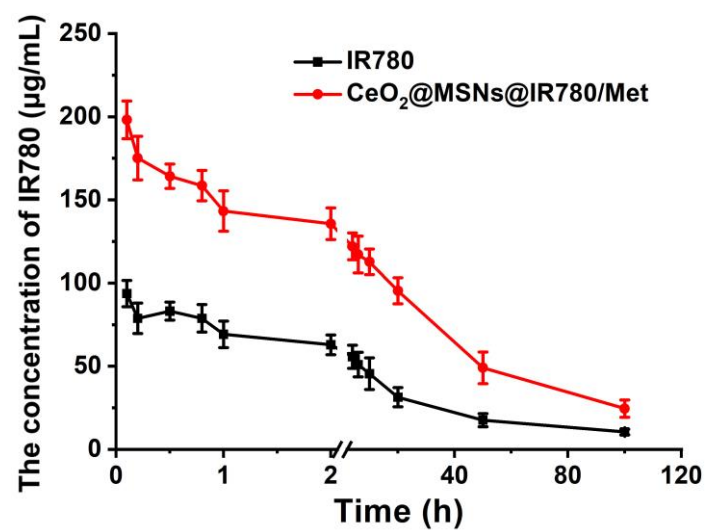

**Figure S6.** Plasma concentration–time curves of CeO<sub>2</sub>@MSNs@IR780/Met in mice after intravenous injection of different IR780 formulations at a dose of 20 mg/kg (n = 5).

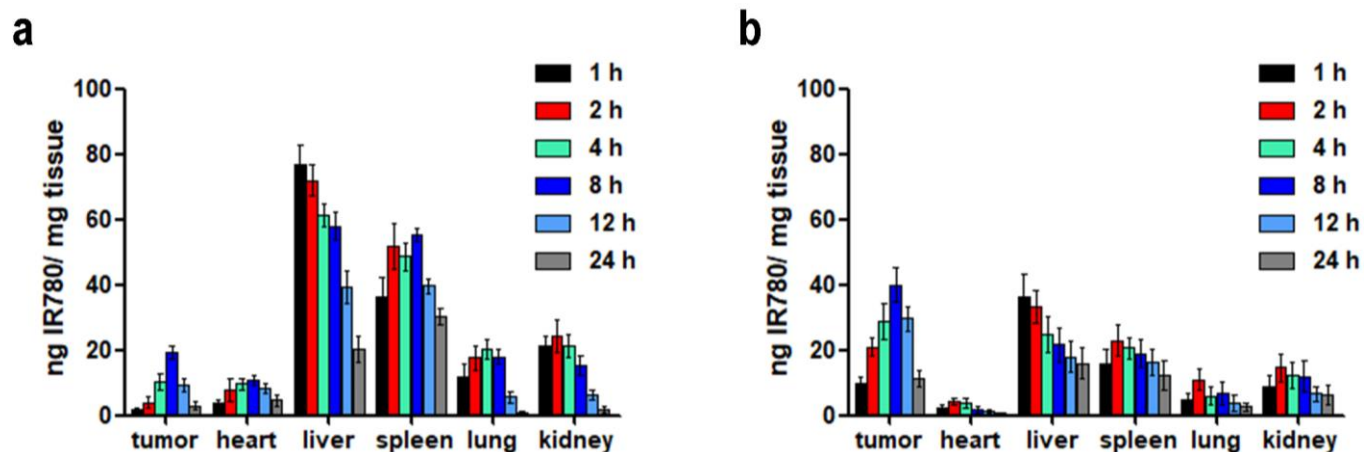

**Figure S7.** *In vivo* tissue distribution in B16F10 tumor-bearing mice intravenously injected with indicated treatments at different time points (20 mg/kg for IR780). (a) Free IR780. (b) CeO<sub>2</sub>@MSNs@IR780/Met (n = 5).



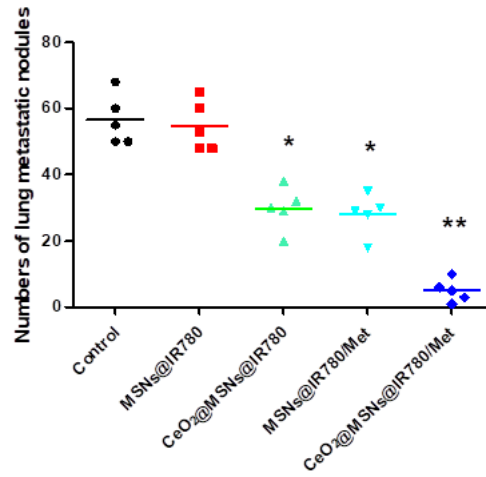

**Figure S8.** Quantification of the metastatic nodules on the lung surface of mice under different treatments. All results were presented as mean  $\pm$  SD (n = 5), \*  $p < 0.05$ , \*\*  $p < 0.01$ .

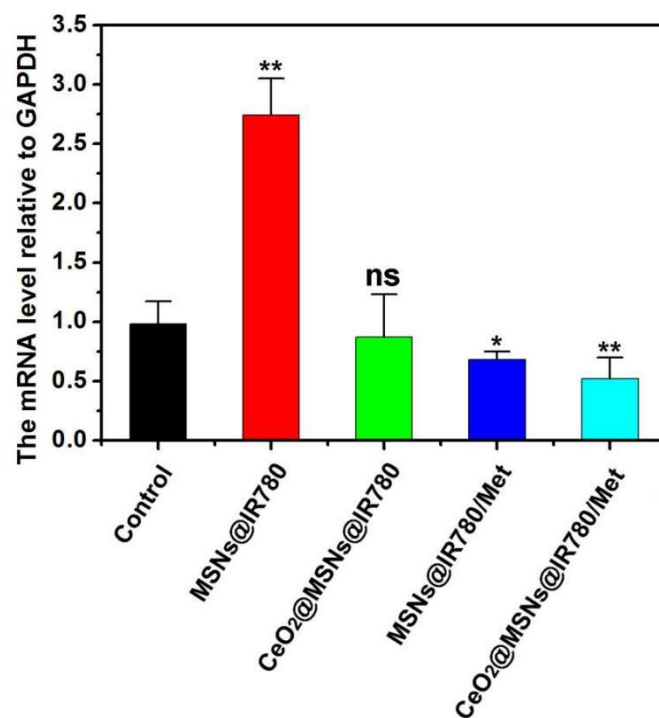

**Figure S9.** Q-PCR analyzed the mRNA level of HIF- $\alpha$  in tumor tissues from B16F10 tumor-bearing mice subjected to indicated treatments. All results were presented as mean  $\pm$  SD ( $n = 5$ ), ns means not significant, \*  $p < 0.05$ , \*\*  $p < 0.01$ .

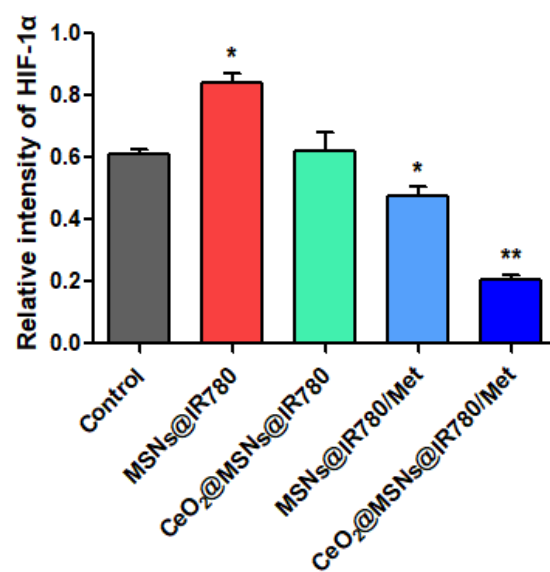

**Figure S10.** Relative intensity of HIF-1 $\alpha$  protein expression by western blotting. \*  $p < 0.05$ , \*\*  $p < 0.01$

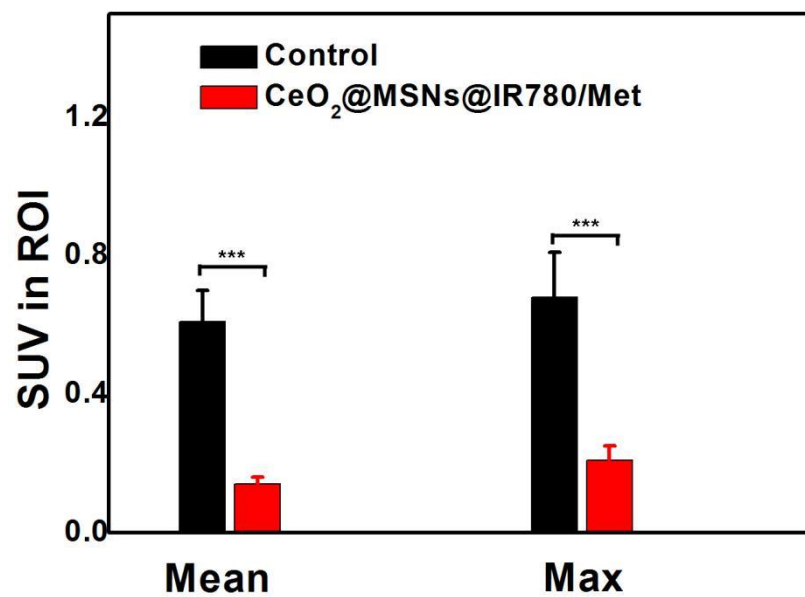

**Figure S11.** Standardized uptake values (SUVs) in solid tumor regions obtained from in vivo PET images taken at 1 h after the injection of <sup>18</sup>F-MISO. All results were presented as mean ± SD (n = 5), \*\*\* *p* < 0.001.

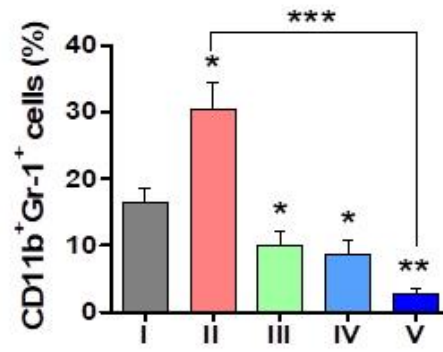

**Figure S12.** Relative quantification of MDSCs (CD11b<sup>+</sup>Gr-1<sup>+</sup>) in tumor tissues following different treatments (I: Control, II: MSNs@IR780 + laser, III: CeO<sub>2</sub>@MSNs@IR780 + laser, IV: MSNs@IR780/Met + laser, V: CeO<sub>2</sub>@MSNs@IR780/Met + laser). All results were presented as mean  $\pm$  SD (n = 5), \*  $p < 0.05$ , \*\*  $p < 0.01$ , \*\*\*  $p < 0.001$ .

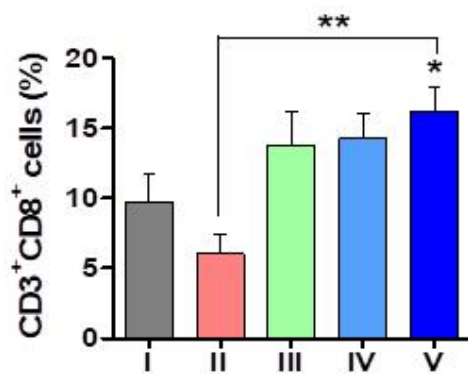

**Figure S13.** Relative quantification of CTLs (CD3<sup>+</sup>CD8<sup>+</sup>) in tumor tissues following different treatments (I: Control, II: MSNs@IR780 + laser, III: CeO<sub>2</sub>@MSNs@IR780 + laser, IV: MSNs@IR780/Met + laser, V: CeO<sub>2</sub>@MSNs@IR780/Met + laser). All results were presented as mean  $\pm$  SD (n = 5), \*  $p$  < 0.05, \*\*  $p$  < 0.01.

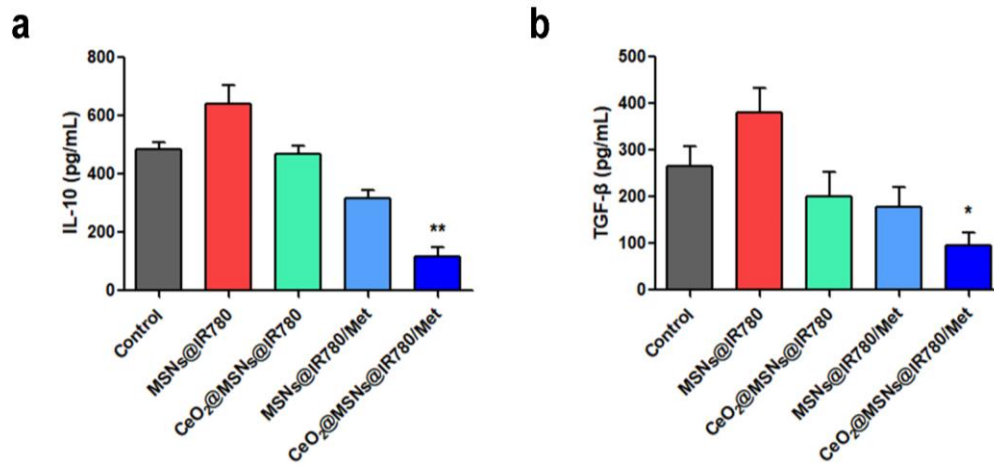

**Figure S14.** ELISA assay for IL-10 (a) and TGF-β (b). Tumor-infiltrating MDSCs were isolated from the tumors of B16F10 tumor-bearing mice under different treatments and cultured for 24 h. The supernatant was subjected to ELISA analysis. \* *p* < 0.05, \*\* *p* < 0.01.

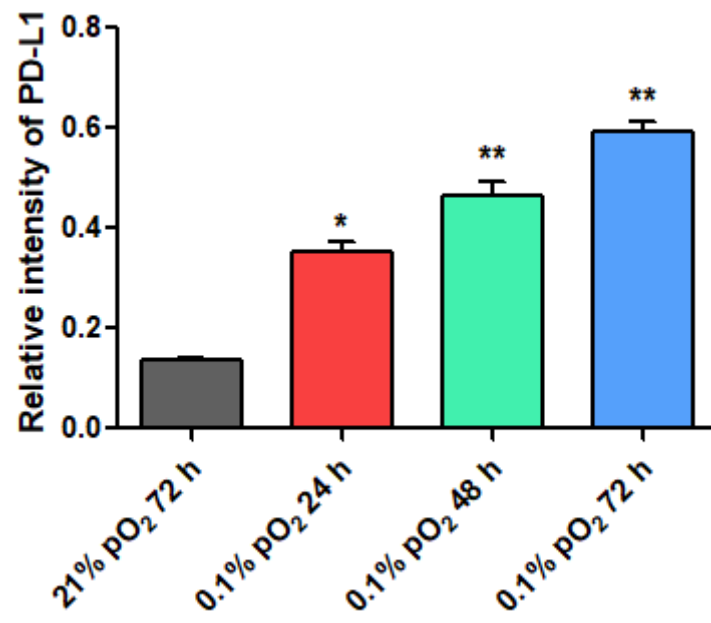

**Figure S15.** Relative intensity of PD-L1 protein expression by western blotting. \*  $p < 0.05$ , \*\*  $p < 0.01$ .



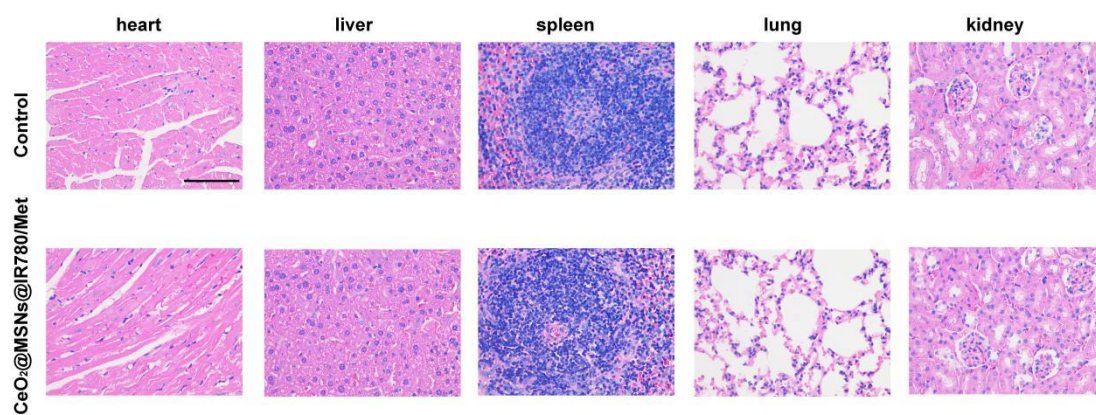

**Figure S16.** Histology of the mouse organs collected 21 days after the intravenous injection of CeO<sub>2</sub>@MSNs@IR780/Met. Scale bar: 100  $\mu$ m.
